# Supplementary material for: Association of Differences in Dietary Behaviours and Lifestyle with Self-Reported Weight Gain during the COVID-19 Lockdown in a University Community from Chile: A Cross-Sectional Study
Source: MDPI journal article supplement (doi:10.3390/nu13093213), 2021-09-16
Supplement: s1 [file s1]

## SUPPLEMENTARY DATA

| Supplementary Table S1. Descriptive characteristics of the population, disaggregated by weight gain during lockdown. |                |                    |                         |                    |                           |                    |                          |                    |         |
|----------------------------------------------------------------------------------------------------------------------|----------------|--------------------|-------------------------|--------------------|---------------------------|--------------------|--------------------------|--------------------|---------|
|                                                                                                                      | Total<br>n=639 |                    | No weight gain<br>n=407 |                    | 5-9% weight gain<br>n=164 |                    | ≥10% weight gain<br>n=68 |                    |         |
|                                                                                                                      | Mean           | Standard deviation | Mean                    | Standard deviation | Mean                      | Standard deviation | Mean                     | Standard deviation | p value |
| <b>Age, years</b>                                                                                                    | 28.9           | 13.2               | 29.9                    | 13.9               | 28.3                      | 12.3               | 25.4*                    | 8.8                | 0.024   |
| <b>BMI before lockdown</b>                                                                                           | 25.1           | 4.8                | 25.2                    | 5.2                | 24.9                      | 3.9                | 24.9                     | 4.4                | 0.719   |
| <b>BMI during lockdown</b>                                                                                           | 25.8           | 5.0                | 25.1                    | 4.2                | 26.6*                     | 4.2                | 28.3*                    | 5.1                | <0.001  |
| Sociodemographic and feeding behaviour data                                                                          |                |                    |                         |                    |                           |                    |                          |                    |         |
|                                                                                                                      | Frequency      | Percentage         | Frequency               | Percentage         | Frequency                 | Percentage         | Frequency                | Percentage         |         |
| <b>Place of residence</b>                                                                                            |                |                    |                         |                    |                           |                    |                          |                    |         |
| Urban                                                                                                                | 546            | 85.4               | 348                     | 85.5               | 141                       | 86.0               | 57                       | 83.8               | 0.825   |
| Rural                                                                                                                | 93             | 14.6               | 59                      | 14.5               | 23                        | 14.0               | 11                       | 16.2               |         |
| <b>Occupation</b>                                                                                                    |                |                    |                         |                    |                           |                    |                          |                    |         |
| Student                                                                                                              | 461            | 72.1               | 282                     | 69.3               | 123                       | 75.0               | 56                       | 82.4               | 0.119   |
| Academic                                                                                                             | 84             | 13.1               | 67                      | 16.5               | 12                        | 7.3                | 5                        | 7.4                |         |
| Administrative                                                                                                       | 94             | 14.7               | 58                      | 14.3               | 29                        | 17.7               | 7                        | 10.3               |         |
| <b>Educational level</b>                                                                                             |                |                    |                         |                    |                           |                    |                          |                    |         |
| Basic (incomplete)                                                                                                   | 4              | 0.6                | 3                       | 0.7                | 1                         | 0.6                | 0                        | 0.0                | 0.028   |
| Basic (complete)                                                                                                     | 30             | 4.7                | 21                      | 5.2                | 6                         | 3.7                | 3                        | 4.4                |         |
| Technical (incomplete)                                                                                               | 6              | 0.9                | 2                       | 0.5                | 1                         | 0.6                | 3                        | 4.4                |         |
| Technical (complete)                                                                                                 | 26             | 4.1                | 14                      | 3.4                | 9                         | 5.5                | 3                        | 4.4                |         |
| University (incomplete)                                                                                              | 405            | 63.4               | 243                     | 59.7               | 118                       | 72.0               | 44                       | 64.7               |         |
| University (complete)                                                                                                | 71             | 11.1               | 47                      | 11.5               | 13                        | 7.9                | 11                       | 16.2               |         |

|                                                                     |     |      |     |      |     |      |    |      |       |
|---------------------------------------------------------------------|-----|------|-----|------|-----|------|----|------|-------|
| Postgraduate                                                        | 97  | 15.2 | 77  | 18.9 | 16  | 9.8  | 4  | 5.9  |       |
| <b>Telecommuting from home</b>                                      | 622 | 97.3 | 395 | 97.1 | 161 | 98.2 | 66 | 97.1 | 0.723 |
| <b>Time for sedentary activities</b>                                |     |      |     |      |     |      |    |      |       |
| One to two hours a day                                              | 32  | 5.0  | 24  | 5.9  | 8   | 4.9  | 0  | 0.0  | 0.010 |
| Three to four hours a day                                           | 70  | 11.0 | 47  | 11.5 | 15  | 9.1  | 8  | 11.8 |       |
| Five to six hours a day                                             | 109 | 17.1 | 76  | 18.7 | 23  | 14.0 | 10 | 14.7 |       |
| Seven to eight hours                                                | 161 | 25.2 | 103 | 25.3 | 40  | 24.4 | 18 | 26.5 |       |
| Nine o ten hours a day                                              | 108 | 16.9 | 68  | 16.7 | 29  | 17.7 | 11 | 16.2 |       |
| Ten or more hours a day                                             | 159 | 24.9 | 89  | 21.9 | 49  | 29.9 | 21 | 30.9 |       |
| <b>Household members</b>                                            |     |      |     |      |     |      |    |      |       |
| Lives alone                                                         | 28  | 4.4  | 21  | 5.2  | 6   | 3.7  | 1  | 1.5  | 0.746 |
| Lives with family (parents and/or siblings or partner and children) | 529 | 82.8 | 333 | 81.8 | 141 | 86.0 | 55 | 80.9 |       |
| Lives with relatives who are not parents and siblings               | 28  | 4.4  | 17  | 4.2  | 6   | 3.7  | 5  | 7.4  |       |
| Lives with friends                                                  | 7   | 1.1  | 5   | 1.2  | 1   | 0.6  | 1  | 1.5  |       |
| Lives with other people who are not family members                  | 9   | 1.4  | 5   | 1.2  | 2   | 1.2  | 2  | 2.9  |       |
| Lives with partner                                                  | 35  | 5.5  | 24  | 5.9  | 8   | 4.9  | 3  | 4.4  |       |
| Other                                                               | 3   | 0.5  | 2   | 0.5  | 0   | 0.0  | 1  | 1.5  |       |
| <b>Lunch</b>                                                        | 365 | 57.1 | 237 | 58.2 | 95  | 57.9 | 33 | 48.5 | 0.223 |

|                                      |     |      |     |      |     |      |    |      |        |
|--------------------------------------|-----|------|-----|------|-----|------|----|------|--------|
| <b>Away from home</b>                | 297 | 46.5 | 190 | 46.7 | 80  | 48.8 | 27 | 39.7 | 0.526  |
| <b>Packed lunch for work</b>         | 206 | 32.2 | 127 | 31.2 | 58  | 35.4 | 21 | 30.9 | 0.683  |
| <b>Differences in habits</b>         |     |      |     |      |     |      |    |      |        |
| Yes, it has gotten worse             | 268 | 41.9 | 112 | 27.5 | 106 | 64.6 | 50 | 73.5 | <0.001 |
| Yes, it has improved                 | 190 | 29.7 | 152 | 37.3 | 27  | 16.5 | 11 | 16.2 |        |
| No, it has stayed the same           | 181 | 28.3 | 143 | 35.1 | 31  | 18.9 | 7  | 10.3 |        |
| <b>Mealtimes before the pandemic</b> |     |      |     |      |     |      |    |      |        |
| Breakfast                            | 521 | 81.5 | 326 | 80.1 | 135 | 82.3 | 60 | 88.2 | 0.119  |
| Mid-morning snack                    | 263 | 41.2 | 174 | 42.8 | 65  | 39.6 | 24 | 35.3 | 0.216  |
| Lunch                                | 613 | 95.9 | 394 | 96.8 | 156 | 95.1 | 63 | 92.6 | 0.088  |
| Mid-afternoon snack                  | 291 | 45.5 | 187 | 45.9 | 76  | 46.3 | 28 | 41.2 | 0.590  |
| Snack before dinner                  | 517 | 80.9 | 317 | 77.9 | 140 | 85.4 | 60 | 88.2 | 0.011  |
| Dinner                               | 141 | 22.1 | 100 | 24.6 | 34  | 20.7 | 7  | 10.3 | 0.011  |
| Late-night snack                     | 119 | 18.6 | 84  | 20.6 | 23  | 14.0 | 12 | 17.6 | 0.185  |
| Snacking between meals               | 219 | 34.3 | 144 | 35.4 | 51  | 31.1 | 24 | 35.3 | 0.640  |
| <b>Mealtimes during the pandemic</b> |     |      |     |      |     |      |    |      |        |
| Breakfast                            | 504 | 78.9 | 328 | 80.6 | 126 | 76.8 | 50 | 73.5 | 0.130  |
| Mid-morning snack                    | 164 | 25.7 | 98  | 24.1 | 49  | 29.9 | 17 | 25.0 | 0.424  |
| Lunch                                | 623 | 97.5 | 395 | 97.1 | 162 | 98.8 | 66 | 97.1 | 0.574  |
| Mid-afternoon snack                  | 294 | 46.0 | 181 | 44.5 | 79  | 48.2 | 34 | 50.0 | 0.295  |
| Snack before dinner                  | 529 | 82.8 | 322 | 79.1 | 147 | 89.6 | 60 | 88.2 | 0.004  |
| Dinner                               | 163 | 25.5 | 114 | 28.0 | 34  | 20.7 | 15 | 22.1 | 0.095  |
| Late-night snack                     | 214 | 33.5 | 117 | 28.7 | 66  | 40.2 | 31 | 45.6 | 0.001  |

|                                      |     |      |     |      |     |      |    |      |        |
|--------------------------------------|-----|------|-----|------|-----|------|----|------|--------|
| Snacking between meals               | 319 | 49.9 | 157 | 38.6 | 114 | 69.5 | 48 | 70.6 | <0.001 |
| <b>Snack between meals</b>           |     |      |     |      |     |      |    |      |        |
| Does not snack between meals         | 95  | 14.9 | 83  | 20.4 | 9   | 5.5  | 3  | 4.4  | 0.005  |
| Same as before                       | 120 | 18.8 | 88  | 21.6 | 23  | 14.0 | 9  | 13.2 |        |
| More than before                     | 282 | 44.1 | 125 | 30.7 | 109 | 66.5 | 48 | 70.6 |        |
| Less than before                     | 142 | 22.2 | 111 | 27.3 | 23  | 14.0 | 8  | 11.8 |        |
| <b>Emotional feeding behaviour</b>   |     |      |     |      |     |      |    |      |        |
| No emotional feeding behaviour       | 121 | 18.9 | 99  | 24.3 | 18  | 11.0 | 4  | 5.9  | <0.001 |
| Little emotional feeding behaviour   | 204 | 31.9 | 146 | 35.9 | 43  | 26.2 | 15 | 22.1 |        |
| Some emotional feeding behaviour     | 260 | 40.7 | 140 | 34.4 | 85  | 51.8 | 35 | 51.5 |        |
| Emotional feeding behaviour          | 54  | 8.5  | 22  | 5.4  | 18  | 11.0 | 14 | 20.6 |        |
| <b>Lifestyle before the pandemic</b> |     |      |     |      |     |      |    |      |        |
| Fantastic lifestyle                  | 76  | 11.9 | 48  | 11.8 | 20  | 12.2 | 8  | 11.8 | 0.229  |
| Right path                           | 306 | 47.9 | 203 | 49.9 | 74  | 45.1 | 29 | 42.6 |        |
| Adequate                             | 164 | 25.7 | 102 | 25.1 | 44  | 26.8 | 18 | 26.5 |        |
| Could be better                      | 89  | 13.9 | 51  | 12.5 | 25  | 15.2 | 13 | 19.1 |        |
| Danger zone                          | 4   | 0.6  | 3   | 0.7  | 1   | 0.6  | 0  | 0.0  |        |
| <b>Lifestyle during the pandemic</b> |     |      |     |      |     |      |    |      |        |
| Fantastic lifestyle                  | 26  | 4.1  | 24  | 5.9  | 2   | 1.2  | 0  | 0.0  | <0.001 |

|                                                                                                                                                                                                       |     |      |     |      |    |      |    |      |       |
|-------------------------------------------------------------------------------------------------------------------------------------------------------------------------------------------------------|-----|------|-----|------|----|------|----|------|-------|
| Right path                                                                                                                                                                                            | 177 | 27.7 | 134 | 32.9 | 33 | 20.1 | 10 | 14.7 |       |
| Adequate                                                                                                                                                                                              | 167 | 26.1 | 109 | 26.8 | 38 | 23.2 | 20 | 29.4 |       |
| Could be better                                                                                                                                                                                       | 242 | 37.9 | 135 | 33.2 | 81 | 49.4 | 26 | 38.2 |       |
| Danger zone                                                                                                                                                                                           | 27  | 4.2  | 5   | 1.2  | 10 | 6.1  | 12 | 17.6 |       |
| <b>Food Safety</b>                                                                                                                                                                                    |     |      |     |      |    |      |    |      |       |
| Safe                                                                                                                                                                                                  | 222 | 34.7 | 158 | 38.8 | 47 | 28.7 | 17 | 25.0 | 0.001 |
| Mildly unsafe                                                                                                                                                                                         | 265 | 41.5 | 163 | 40.0 | 71 | 43.3 | 31 | 45.6 |       |
| Moderately unsafe                                                                                                                                                                                     | 86  | 13.5 | 51  | 12.5 | 29 | 17.7 | 6  | 8.8  |       |
| Severely unsafe                                                                                                                                                                                       | 66  | 10.3 | 35  | 8.6  | 17 | 10.4 | 14 | 20.6 |       |
| Comparisons were made with ANOVA one-way and Dunnett poshoc test, X <sup>2</sup> , and X <sup>2</sup> for trend<br>*statistically significant difference with respect to the group of No weight gain. |     |      |     |      |    |      |    |      |       |

| Supplementary Table S2. Descriptive data of the frequencies of self-reported food intake before and during the lockdown |                 |            |                 |            |            |
|-------------------------------------------------------------------------------------------------------------------------|-----------------|------------|-----------------|------------|------------|
|                                                                                                                         | Before lockdown |            | During lockdown |            |            |
|                                                                                                                         | Frequency       | Percentage | Frequency       | Percentage | Valor de p |
| <b>White or whole wheat bread</b>                                                                                       |                 |            |                 |            | 0.013      |
| Never                                                                                                                   | 85              | 13.3       | 83              | 13.0       |            |
| Once a month or less                                                                                                    | 63              | 9.9        | 60              | 9.4        |            |
| Once a week or every 15 days                                                                                            | 54              | 8.5        | 45              | 7.0        |            |
| 2-3 times a week                                                                                                        | 94              | 14.7       | 90              | 14.1       |            |
| 4-6 times a week                                                                                                        | 59              | 9.2        | 90              | 14.1       |            |
| Everyday                                                                                                                | 216             | 33.8       | 189             | 29.6       |            |
| Every day, several times a day                                                                                          | 68              | 10.6       | 82              | 12.8       |            |
| <b>Rice, potatoes, noodles, or quinoa</b>                                                                               |                 |            |                 |            | <0.001     |
| Never                                                                                                                   | 7               | 1.1        | 5               | 0.8        |            |
| Once a month or less                                                                                                    | 18              | 2.8        | 8               | 1.3        |            |
| Once a week or every 15 days                                                                                            | 100             | 15.6       | 71              | 11.1       |            |
| 2-3 times a week                                                                                                        | 322             | 50.4       | 271             | 42.4       |            |
| 4-6 times a week                                                                                                        | 139             | 21.8       | 220             | 34.4       |            |
| Everyday                                                                                                                | 50              | 7.8        | 57              | 8.9        |            |
| Every day, several times a day                                                                                          | 3               | 0.5        | 7               | 1.1        |            |
| <b>Raw and / or cooked vegetables</b>                                                                                   |                 |            |                 |            | 0.345      |
| Never                                                                                                                   | 6               | 0.9        | 6               | 0.9        |            |
| Once a month or less                                                                                                    | 17              | 2.7        | 16              | 2.5        |            |
| Once a week or every 15 days                                                                                            | 73              | 11.4       | 63              | 9.9        |            |
| 2-3 times a week                                                                                                        | 174             | 27.2       | 151             | 23.6       |            |
| 4-6 times a week                                                                                                        | 132             | 20.7       | 156             | 24.4       |            |
| Everyday                                                                                                                | 190             | 29.7       | 198             | 31.0       |            |
| Every day, several times a day                                                                                          | 47              | 7.4        | 49              | 7.7        |            |
| <b>Natural fruit (excludes juices)</b>                                                                                  |                 |            |                 |            | 0.030      |
| Never                                                                                                                   | 17              | 2.7        | 24              | 3.8        |            |
| Once a month or less                                                                                                    | 43              | 6.7        | 52              | 8.1        |            |
| Once a week or every 15 days                                                                                            | 129             | 20.2       | 120             | 18.8       |            |
| 2-3 times a week                                                                                                        | 200             | 31.3       | 173             | 27.1       |            |
| 4-6 times a week                                                                                                        | 115             | 18.0       | 116             | 18.2       |            |

|                                                  |     |      |     |      |        |
|--------------------------------------------------|-----|------|-----|------|--------|
| Everyday                                         | 87  | 13.6 | 111 | 17.4 |        |
| Every day, several times a day                   | 48  | 7.5  | 43  | 6.7  |        |
| <b>Dried vegetables</b>                          |     |      |     |      | <0.001 |
| Never                                            | 24  | 3.8  | 16  | 2.5  |        |
| Once a month or less                             | 60  | 9.4  | 52  | 8.1  |        |
| Once a week or every 15 days                     | 273 | 42.7 | 211 | 33.0 |        |
| 2-3 times a week                                 | 224 | 35.1 | 275 | 43.0 |        |
| 4-6 times a week                                 | 48  | 7.5  | 71  | 11.1 |        |
| Everyday                                         | 9   | 1.4  | 12  | 1.9  |        |
| Every day, several times a day                   | 1   | 0.2  | 2   | 0.3  |        |
| <b>Milk, yogurt, or kefir</b>                    |     |      |     |      | 0.518  |
| Never                                            | 46  | 7.2  | 46  | 7.2  |        |
| Once a month or less                             | 45  | 7.0  | 58  | 9.1  |        |
| Once a week or every 15 days                     | 108 | 16.9 | 97  | 15.2 |        |
| 2-3 times a week                                 | 168 | 26.3 | 174 | 27.2 |        |
| 4-6 times a week                                 | 121 | 18.9 | 109 | 17.1 |        |
| Everyday                                         | 116 | 18.2 | 120 | 18.8 |        |
| Every day, several times a day                   | 35  | 5.5  | 35  | 5.5  |        |
| <b>Cheeses (aged, fresh, farm, etc.)</b>         |     |      |     |      | 0.185  |
| Never                                            | 40  | 6.3  | 48  | 7.5  |        |
| Once a month or less                             | 60  | 9.4  | 78  | 12.2 |        |
| Once a week or every 15 days                     | 128 | 20.0 | 117 | 18.3 |        |
| 2-3 times a week                                 | 226 | 35.4 | 216 | 33.8 |        |
| 4-6 times a week                                 | 138 | 21.6 | 124 | 19.4 |        |
| Everyday                                         | 38  | 5.9  | 41  | 6.4  |        |
| Every day, several times a day                   | 9   | 1.4  | 15  | 2.3  |        |
| <b>Meat (pork, chicken, beef, lamb, etc.)</b>    |     |      |     |      | 0.309  |
| Never                                            | 46  | 7.2  | 53  | 8.3  |        |
| Once a month or less                             | 20  | 3.1  | 26  | 4.1  |        |
| Once a week or every 15 days                     | 111 | 17.4 | 116 | 18.2 |        |
| 2-3 times a week                                 | 274 | 42.9 | 267 | 41.8 |        |
| 4-6 times a week                                 | 151 | 23.6 | 139 | 21.8 |        |
| Everyday                                         | 32  | 5.0  | 33  | 5.2  |        |
| Every day, several times a day                   | 5   | 0.8  | 5   | 0.8  |        |
| <b>Processed meats and sausages (Turkey ham,</b> |     |      |     |      | 0.019  |

|                                                                  |     |      |     |      |        |
|------------------------------------------------------------------|-----|------|-----|------|--------|
| <b>Viennese, hamburgers, sausage, salami, mortadella, etc.</b>   |     |      |     |      |        |
| Never                                                            | 81  | 12.7 | 85  | 13.3 |        |
| Once a month or less                                             | 77  | 12.1 | 94  | 14.7 |        |
| Once a week or every 15 days                                     | 157 | 24.6 | 178 | 27.9 |        |
| 2-3 times a week                                                 | 186 | 29.1 | 167 | 26.1 |        |
| 4-6 times a week                                                 | 111 | 17.4 | 87  | 13.6 |        |
| Everyday                                                         | 25  | 3.9  | 25  | 3.9  |        |
| Every day, several times a day                                   | 2   | 0.3  | 3   | 0.5  |        |
| <b>Fresh and canned seafood</b>                                  |     |      |     |      | 0.043  |
| Never                                                            | 57  | 8.9  | 68  | 10.6 |        |
| Once a month or less                                             | 135 | 21.1 | 112 | 17.5 |        |
| Once a week or every 15 days                                     | 267 | 41.8 | 256 | 40.1 |        |
| 2-3 times a week                                                 | 156 | 24.4 | 168 | 26.3 |        |
| 4-6 times a week                                                 | 19  | 3.0  | 33  | 5.2  |        |
| Everyday                                                         | 5   | 0.8  | 2   | 0.3  |        |
| Every day, several times a day                                   | 0   | 0.0  | 0   | 0.0  |        |
| <b>Eggs</b>                                                      |     |      |     |      | 0.024  |
| Never                                                            | 25  | 3.9  | 29  | 4.5  |        |
| Once a month or less                                             | 23  | 3.6  | 32  | 5.0  |        |
| Once a week or every 15 days                                     | 106 | 16.6 | 106 | 16.6 |        |
| 2-3 times a week                                                 | 268 | 41.9 | 239 | 37.4 |        |
| 4-6 times a week                                                 | 142 | 22.2 | 162 | 25.4 |        |
| Everyday                                                         | 62  | 9.7  | 57  | 8.9  |        |
| Every day, several times a day                                   | 13  | 2.0  | 14  | 2.2  |        |
| <b>Nuts (excludes raisins)</b>                                   |     |      |     |      | <0.001 |
| Never                                                            | 73  | 11.4 | 121 | 18.9 |        |
| Once a month or less                                             | 142 | 22.2 | 154 | 24.1 |        |
| Once a week or every 15 days                                     | 187 | 29.3 | 157 | 24.6 |        |
| 2-3 times a week                                                 | 125 | 19.6 | 111 | 17.4 |        |
| 4-6 times a week                                                 | 63  | 9.9  | 58  | 9.1  |        |
| Everyday                                                         | 34  | 5.3  | 28  | 4.4  |        |
| Every day, several times a day                                   | 15  | 2.3  | 10  | 1.6  |        |
| <b>Butter, margarine, vegetable oil or fats of animal origin</b> |     |      |     |      | 0.175  |
| Never                                                            | 32  | 5.0  | 38  | 5.9  |        |



|                                                               |     |      |     |      |       |
|---------------------------------------------------------------|-----|------|-----|------|-------|
| Once a month or less                                          | 60  | 9.4  | 75  | 11.7 |       |
| Once a week or every 15 days                                  | 109 | 17.1 | 98  | 15.3 |       |
| 2-3 times a week                                              | 162 | 25.4 | 159 | 24.9 |       |
| 4-6 times a week                                              | 123 | 19.2 | 121 | 18.9 |       |
| Everyday                                                      | 125 | 19.6 | 120 | 18.8 |       |
| Every day, several times a day                                | 28  | 4.4  | 28  | 4.4  |       |
| <b>Sweet or filled cookies, cakes, etc.</b>                   |     |      |     |      | 0.038 |
| Never                                                         | 23  | 3.6  | 37  | 5.8  |       |
| Once a month or less                                          | 90  | 14.1 | 115 | 18.0 |       |
| Once a week or every 15 days                                  | 189 | 29.6 | 163 | 25.5 |       |
| 2-3 times a week                                              | 183 | 28.6 | 180 | 28.2 |       |
| 4-6 times a week                                              | 102 | 16.0 | 103 | 16.1 |       |
| Everyday                                                      | 45  | 7.0  | 36  | 5.6  |       |
| Every day, several times a day                                | 7   | 1.1  | 5   | 0.8  |       |
| <b>Chocolates and chocolate-based products</b>                |     |      |     |      | 0.003 |
| Never                                                         | 34  | 5.3  | 54  | 8.5  |       |
| Once a month or less                                          | 157 | 24.6 | 169 | 26.4 |       |
| Once a week or every 15 days                                  | 204 | 31.9 | 177 | 27.7 |       |
| 2-3 times a week                                              | 168 | 26.3 | 145 | 22.7 |       |
| 4-6 times a week                                              | 53  | 8.3  | 75  | 11.7 |       |
| Everyday                                                      | 19  | 3.0  | 12  | 1.9  |       |
| Every day, several times a day                                | 4   | 0.6  | 7   | 1.1  |       |
| <b>Salty snacks like French fries, doritos, cheetos, etc.</b> |     |      |     |      | 0.348 |
| Never                                                         | 63  | 9.9  | 82  | 12.8 |       |
| Once a month or less                                          | 150 | 23.5 | 155 | 24.3 |       |
| Once a week or every 15 days                                  | 229 | 35.8 | 191 | 29.9 |       |
| 2-3 times a week                                              | 131 | 20.5 | 142 | 22.2 |       |
| 4-6 times a week                                              | 49  | 7.7  | 50  | 7.8  |       |
| Everyday                                                      | 12  | 1.9  | 16  | 2.5  |       |
| Every day, several times a day                                | 5   | 0.8  | 3   | 0.5  |       |
| <b>Drinks or juices with added sugar</b>                      |     |      |     |      | 0.001 |
| Never                                                         | 121 | 18.9 | 151 | 23.6 |       |
| Once a month or less                                          | 113 | 17.7 | 141 | 22.1 |       |

|                                    |     |      |     |      |        |
|------------------------------------|-----|------|-----|------|--------|
| Once a week or every 15 days       | 137 | 21.4 | 113 | 17.7 |        |
| 2-3 times a week                   | 131 | 20.5 | 117 | 18.3 |        |
| 4-6 times a week                   | 76  | 11.9 | 60  | 9.4  |        |
| Everyday                           | 43  | 6.7  | 39  | 6.1  |        |
| Every day, several times a day     | 18  | 2.8  | 18  | 2.8  |        |
| <b>Alcoholic drinks</b>            |     |      |     |      | <0.001 |
| Never                              | 196 | 30.7 | 272 | 42.6 |        |
| Once a month or less               | 194 | 30.4 | 175 | 27.4 |        |
| Once a week or every 15 days       | 159 | 24.9 | 105 | 16.4 |        |
| 2-3 times a week                   | 74  | 11.6 | 57  | 8.9  |        |
| 4-6 times a week                   | 8   | 1.3  | 17  | 2.7  |        |
| Everyday                           | 7   | 1.1  | 11  | 1.7  |        |
| Every day, several times a day     | 1   | 0.2  | 2   | 0.3  |        |
| <b>Sugar (white or brown)</b>      |     |      |     |      | 0.348  |
| Never                              | 155 | 24.3 | 178 | 27.9 |        |
| Once a month or less               | 83  | 13.0 | 78  | 12.2 |        |
| Once a week or every 15 days       | 63  | 9.9  | 67  | 10.5 |        |
| 2-3 times a week                   | 74  | 11.6 | 64  | 10.0 |        |
| 4-6 times a week                   | 47  | 7.4  | 41  | 6.4  |        |
| Everyday                           | 139 | 21.8 | 130 | 20.3 |        |
| Every day, several times a day     | 78  | 12.2 | 81  | 12.7 |        |
| Data compared by the McNemar test. |     |      |     |      |        |

Supplementary Table S3. Univariate results of the linear regression models for the prediction of self-reported weight, BMI, and percentage weight gain during lockdown from higher food intake during lockdown

|                                                           | Difference in self-reported weight |                |        | BMI difference |                |        | Percentage of self-reported weight change |                |        |
|-----------------------------------------------------------|------------------------------------|----------------|--------|----------------|----------------|--------|-------------------------------------------|----------------|--------|
|                                                           | B <sub>0</sub>                     | B <sub>1</sub> | P      | B <sub>0</sub> | B <sub>1</sub> | P      | B <sub>0</sub>                            | B <sub>1</sub> | P      |
| White or whole wheat bread                                | 1.69                               | 1.24           | 0.002  | 0.61           | 0.47           | <0.001 | 2.62                                      | 1.66           | 0.002  |
| Rice, potatoes, noodles, or quinoa                        | 1.59                               | 1.27           | 0.001  | 0.58           | 0.48           | <0.001 | 2.45                                      | 1.80           | 0.003  |
| Raw and / or cooked vegetables                            | 2.34                               | -1.41          | <0.001 | 0.86           | -0.51          | <0.001 | 3.43                                      | -1.67          | 0.002  |
| Natural fruit (excludes juices)                           | 2.33                               | -1.19          | 0.002  | 0.86           | -0.44          | <0.001 | 3.48                                      | -1.61          | 0.002  |
| Dried vegetables                                          | 2.14                               | -0.46          | 0.201  | 0.78           | -0.16          | 0.206  | 3.22                                      | -0.60          | 0.204  |
| Milk, yogurt, or kefir                                    | 2.18                               | -0.72          | 0.060  | 0.80           | -0.27          | 0.064  | 3.27                                      | -0.93          | 0.082  |
| Cheeses (aged, fresh, farm, etc.)                         | 1.80                               | 0.87           | 0.030  | 0.66           | 0.33           | 0.032  | 2.73                                      | 1.32           | 0.022  |
| Meat (pork, chicken, beef, lamb, etc.)                    | 1.85                               | 0.82           | 0.070  | 0.68           | 0.29           | 0.073  | 2.78                                      | 1.37           | 0.031  |
| Processed meats and sausages                              | 1.65                               | 1.77           | <0.001 | 0.60           | 0.66           | <0.001 | 2.56                                      | 2.43           | <0.001 |
| Fresh and canned seafood                                  | 2.08                               | -0.31          | 0.402  | 0.76           | -0.12          | 0.410  | 3.10                                      | -0.27          | 0.600  |
| Eggs                                                      | 1.98                               | 0.07           | 0.910  | 0.73           | 0.02           | 0.911  | 2.97                                      | 0.23           | 0.713  |
| Nuts (excludes raisins)                                   | 2.08                               | -0.43          | 0.301  | 0.76           | -0.13          | 0.420  | 3.11                                      | -0.41          | 0.502  |
| Butter, margarine, vegetable oil or fats of animal origin | 1.77                               | 0.87           | 0.021  | 0.65           | 0.32           | 0.030  | 2.73                                      | 1.15           | 0.031  |
| Sweet or filled cookies, cakes, etc.                      | 1.34                               | 2.26           | <0.001 | 0.49           | 0.84           | <0.001 | 2.08                                      | 3.26           | <0.001 |
| Chocolates and chocolate-based products                   | 1.47                               | 1.96           | <0.001 | 0.54           | 0.73           | <0.001 | 2.24                                      | 2.93           | <0.001 |
| Salty snacks                                              | 1.37                               | 2.23           | <0.001 | 0.50           | 0.83           | <0.001 | 2.15                                      | 3.08           | <0.001 |
| Drinks or juices with added sugar                         | 1.58                               | 1.91           | <0.001 | 0.57           | 0.73           | <0.001 | 2.40                                      | 2.87           | <0.001 |
| Alcoholic drinks                                          | 1.88                               | 0.73           | 0.101  | 0.69           | 0.28           | 0.094  | 2.84                                      | 1.14           | 0.080  |
| Sugar (white or brown)                                    | 1.69                               | 1.69           | <0.001 | 0.61           | 0.65           | 0.001  | 2.63                                      | 2.18           | 0.003  |

| Supplementary Table S4. Multilevel logistic regression models to determine the odds of a ≥5% self-reported weight gain during lockdown by the consumption frequencies |           |       |       |         |
|-----------------------------------------------------------------------------------------------------------------------------------------------------------------------|-----------|-------|-------|---------|
|                                                                                                                                                                       |           | 95%CI |       |         |
|                                                                                                                                                                       | OR        | lower | upper | P value |
| <b>White or whole wheat bread</b>                                                                                                                                     |           |       |       |         |
| Never                                                                                                                                                                 | Reference |       |       |         |
| Once a month or less                                                                                                                                                  | 0.85      | 0.43  | 1.68  | 0.701   |
| Once a week or every 15 days                                                                                                                                          | 0.83      | 0.40  | 1.75  | 0.600   |
| 2-3 times a week                                                                                                                                                      | 0.79      | 0.43  | 1.46  | 0.522   |
| 4-6 times a week                                                                                                                                                      | 0.53      | 0.28  | 0.99  | 0.050   |
| Everyday                                                                                                                                                              | 0.64      | 0.37  | 1.09  | 0.091   |
| Every day, several times a day                                                                                                                                        | 1.51      | 0.82  | 2.80  | 0.211   |
| <b>Rice, potatoes, noodles, or quinoa</b>                                                                                                                             |           |       |       |         |
| Never                                                                                                                                                                 | Reference |       |       |         |
| Once a month or less                                                                                                                                                  | 0.57      | 0.03  | 11.85 | 0.744   |
| Once a week or every 15 days                                                                                                                                          | 1.92      | 0.20  | 18.13 | 0.601   |
| 2-3 times a week                                                                                                                                                      | 1.92      | 0.21  | 17.46 | 0.600   |
| 4-6 times a week                                                                                                                                                      | 3.04      | 0.33  | 27.64 | 0.302   |
| Everyday                                                                                                                                                              | 2.91      | 0.31  | 27.70 | 0.303   |
| Every day, several times a day                                                                                                                                        | 5.33      | 0.38  | 75.78 | 0.203   |
| <b>Raw and / or cooked vegetables</b>                                                                                                                                 |           |       |       |         |
| Never                                                                                                                                                                 | Reference |       |       |         |
| Once a month or less                                                                                                                                                  | 1.00      | 0.15  | 6.53  | 0.905   |
| Once a week or every 15 days                                                                                                                                          | 1.10      | 0.21  | 5.87  | 0.909   |
| 2-3 times a week                                                                                                                                                      | 0.54      | 0.11  | 2.77  | 0.407   |
| 4-6 times a week                                                                                                                                                      | 0.49      | 0.09  | 2.49  | 0.302   |
| Everyday                                                                                                                                                              | 0.62      | 0.12  | 3.17  | 0.504   |
| Every day, several times a day                                                                                                                                        | 0.32      | 0.06  | 1.83  | 0.202   |
| <b>Natural fruit (excludes juices)</b>                                                                                                                                |           |       |       |         |
| Never                                                                                                                                                                 | Reference |       |       |         |
| Once a month or less                                                                                                                                                  | 1.30      | 0.49  | 3.44  | 0.600   |
| Once a week or every 15 days                                                                                                                                          | 0.97      | 0.40  | 2.35  | 0.999   |
| 2-3 times a week                                                                                                                                                      | 0.86      | 0.36  | 2.06  | 0.700   |
| 4-6 times a week                                                                                                                                                      | 0.68      | 0.28  | 1.68  | 0.404   |
| Everyday                                                                                                                                                              | 0.76      | 0.31  | 1.87  | 0.505   |
| Every day, several times a day                                                                                                                                        | 0.37      | 0.12  | 1.11  | 0.080   |
| <b>Dried vegetables</b>                                                                                                                                               |           |       |       |         |
| Never                                                                                                                                                                 | Reference |       |       |         |
| Once a month or less                                                                                                                                                  | 1.32      | 0.42  | 4.18  | 0.606   |
| Once a week or every 15 days                                                                                                                                          | 0.94      | 0.33  | 2.68  | 0.900   |
| 2-3 times a week                                                                                                                                                      | 1.00      | 0.35  | 2.83  | 0.905   |
| 4-6 times a week                                                                                                                                                      | 0.96      | 0.31  | 2.96  | 0.910   |
| Everyday                                                                                                                                                              | 0.33      | 0.05  | 2.07  | 0.210   |
| Every day, several times a day                                                                                                                                        | 0.00      | 0.00  |       | 0.999   |
| <b>Milk, yogurt, or kefir</b>                                                                                                                                         |           |       |       |         |
| Never                                                                                                                                                                 | Reference |       |       |         |

|                                                                                                           |           |      |       |        |
|-----------------------------------------------------------------------------------------------------------|-----------|------|-------|--------|
| Once a month or less                                                                                      | 1.79      | 0.81 | 3.92  | 0.105  |
| Once a week or every 15 days                                                                              | 1.35      | 0.66 | 2.75  | 0.402  |
| 2-3 times a week                                                                                          | 0.84      | 0.43 | 1.64  | 0.600  |
| 4-6 times a week                                                                                          | 0.80      | 0.39 | 1.63  | 0.502  |
| Everyday                                                                                                  | 0.57      | 0.28 | 1.16  | 0.101  |
| Every day, several times a day                                                                            | 0.81      | 0.32 | 2.03  | 0.604  |
| <b>Cheeses (aged, fresh, farm, etc.)</b>                                                                  |           |      |       |        |
| Never                                                                                                     | Reference |      |       |        |
| Once a month or less                                                                                      | 1.51      | 0.69 | 3.31  | 0.309  |
| Once a week or every 15 days                                                                              | 1.40      | 0.67 | 2.94  | 0.302  |
| 2-3 times a week                                                                                          | 1.58      | 0.79 | 3.17  | 0.104  |
| 4-6 times a week                                                                                          | 1.64      | 0.79 | 3.42  | 0.140  |
| Everyday                                                                                                  | 3.12      | 1.29 | 7.55  | 0.010  |
| Every day, several times a day                                                                            | 1.79      | 0.53 | 6.04  | 0.350  |
| <b>Meat (pork, chicken, beef, lamb, etc.)</b>                                                             |           |      |       |        |
| Never                                                                                                     | Reference |      |       |        |
| Once a month or less                                                                                      | 1.03      | 0.39 | 2.71  | 0.966  |
| Once a week or every 15 days                                                                              | 0.97      | 0.50 | 1.90  | 0.921  |
| 2-3 times a week                                                                                          | 0.84      | 0.46 | 1.55  | 0.540  |
| 4-6 times a week                                                                                          | 1.15      | 0.60 | 2.20  | 0.674  |
| Everyday                                                                                                  | 1.22      | 0.50 | 2.95  | 0.604  |
| Every day, several times a day                                                                            | 1.10      | 0.17 | 7.16  | 0.909  |
| <b>Processed meats and sausages (Turkey ham, Viennese, hamburgers, sausage, salami, mortadella, etc.)</b> |           |      |       |        |
| Never                                                                                                     | Reference |      |       |        |
| Once a month or less                                                                                      | 1.10      | 0.59 | 2.05  | 0.700  |
| Once a week or every 15 days                                                                              | 1.01      | 0.58 | 1.75  | 0.902  |
| 2-3 times a week                                                                                          | 1.23      | 0.71 | 2.14  | 0.401  |
| 4-6 times a week                                                                                          | 1.99      | 1.07 | 3.69  | 0.030  |
| Everyday                                                                                                  | 1.15      | 0.45 | 2.91  | 0.730  |
| Every day, several times a day                                                                            | 1.02      | 0.09 | 11.71 | 0.930  |
| <b>Fresh and canned seafood</b>                                                                           |           |      |       |        |
| Never                                                                                                     | Reference |      |       |        |
| Once a month or less                                                                                      | 0.84      | 0.45 | 1.55  | 0.530  |
| Once a week or every 15 days                                                                              | 0.79      | 0.46 | 1.37  | 0.450  |
| 2-3 times a week                                                                                          | 0.65      | 0.37 | 1.17  | 0.139  |
| 4-6 times a week                                                                                          | 0.87      | 0.37 | 2.04  | 0.720  |
| Everyday                                                                                                  | 1.34      | 0.08 | 22.41 | 0.822  |
| Every day, several times a day                                                                            | 0.00      | 0.00 | 0.00  | <0.001 |
| <b>Eggs</b>                                                                                               |           |      |       |        |
| Never                                                                                                     | Reference |      |       |        |
| Once a month or less                                                                                      | 1.25      | 0.45 | 3.45  | 0.614  |
| Once a week or every 15 days                                                                              | 0.79      | 0.34 | 1.83  | 0.543  |
| 2-3 times a week                                                                                          | 0.70      | 0.32 | 1.54  | 0.329  |
| 4-6 times a week                                                                                          | 0.79      | 0.35 | 1.77  | 0.538  |

|                                                                  |              |      |       |        |
|------------------------------------------------------------------|--------------|------|-------|--------|
| Everyday                                                         | 1.57         | 0.64 | 3.89  | 0.334  |
| Every day, several times a day                                   | 0.57         | 0.14 | 2.24  | 0.435  |
| <b>Nuts (excludes raisins)</b>                                   |              |      |       |        |
| Never                                                            | Reference    |      |       |        |
| Once a month or less                                             | 1.07         | 0.66 | 1.74  | 0.719  |
| Once a week or every 15 days                                     | 0.88         | 0.54 | 1.44  | 0.629  |
| 2-3 times a week                                                 | 0.62         | 0.36 | 1.07  | 0.084  |
| 4-6 times a week                                                 | 0.56         | 0.28 | 1.11  | 0.090  |
| Everyday                                                         | 0.70         | 0.29 | 1.67  | 0.400  |
| Every day, several times a day                                   | 1.47         | 0.40 | 5.35  | 0.514  |
| <b>Butter, margarine, vegetable oil or fats of animal origin</b> |              |      |       |        |
| Never                                                            | Reference    |      |       |        |
| Once a month or less                                             | 0.74         | 0.31 | 1.74  | 0.415  |
| Once a week or every 15 days                                     | 0.78         | 0.35 | 1.77  | 0.514  |
| 2-3 times a week                                                 | 1.18         | 0.55 | 2.51  | 0.620  |
| 4-6 times a week                                                 | 1.93         | 0.89 | 4.17  | 0.060  |
| Everyday                                                         | 1.60         | 0.74 | 3.47  | 0.201  |
| Every day, several times a day                                   | 2.50         | 0.91 | 6.86  | 0.074  |
| <b>Sweet or filled cookies, cakes, etc.</b>                      |              |      |       |        |
| Never                                                            | Reference    |      |       |        |
| Once a month or less                                             | 1.60         | 0.56 | 4.56  | 0.340  |
| Once a week or every 15 days                                     | 2.52         | 0.92 | 6.86  | 0.070  |
| 2-3 times a week                                                 | 6.12         | 2.28 | 16.42 | <0.001 |
| 4-6 times a week                                                 | 5.81         | 2.10 | 16.09 | 0.001  |
| Everyday                                                         | 8.00         | 2.54 | 25.24 | <0.001 |
| Every day, several times a day                                   | No estimable |      |       |        |
| <b>Chocolates and chocolate-based products</b>                   |              |      |       |        |
| Never                                                            | Reference    |      |       |        |
| Once a month or less                                             | 1.14         | 0.56 | 2.33  | 0.740  |
| Once a week or every 15 days                                     | 1.70         | 0.85 | 3.41  | 0.141  |
| 2-3 times a week                                                 | 2.63         | 1.30 | 5.33  | 0.007  |
| 4-6 times a week                                                 | 3.42         | 1.58 | 7.39  | 0.002  |
| Everyday                                                         | 3.15         | 0.87 | 11.48 | 0.100  |
| Every day, several times a day                                   | 7.88         | 1.36 | 45.58 | 0.020  |
| <b>Salty snacks like French fries, doritos, cheetos, etc.</b>    |              |      |       |        |
| Never                                                            | Reference    |      |       |        |
| Once a month or less                                             | 1.20         | 0.62 | 2.34  | 0.540  |
| Once a week or every 15 days                                     | 2.44         | 1.31 | 4.54  | 0.005  |
| 2-3 times a week                                                 | 4.62         | 2.44 | 8.74  | <0.001 |
| 4-6 times a week                                                 | 5.25         | 2.40 | 11.47 | <0.001 |
| Everyday                                                         | 5.30         | 1.72 | 16.40 | 0.004  |
| Every day, several times a day                                   | 8.25         | 0.70 | 96.74 | 0.094  |
| <b>Drinks or juices with added sugar</b>                         |              |      |       |        |
| Never                                                            | Reference    |      |       |        |
| Once a month or less                                             | 0.83         | 0.49 | 1.40  | 0.401  |

|                                                |           |      |       |        |
|------------------------------------------------|-----------|------|-------|--------|
| Once a week or every 15 days                   | 1.43      | 0.85 | 2.41  | 0.111  |
| 2-3 times a week                               | 2.74      | 1.65 | 4.54  | <0.001 |
| 4-6 times a week                               | 1.92      | 1.03 | 3.57  | 0.034  |
| Everyday                                       | 2.93      | 1.42 | 6.03  | 0.004  |
| Every day, several times a day                 | 2.51      | 0.93 | 6.75  | 0.060  |
| <b>Alcoholic drinks</b>                        |           |      |       |        |
| Never                                          | Reference |      |       |        |
| Once a month or less                           | 0.98      | 0.66 | 1.46  | 0.991  |
| Once a week or every 15 days                   | 1.03      | 0.64 | 1.63  | 0.923  |
| 2-3 times a week                               | 0.83      | 0.46 | 1.52  | 0.505  |
| 4-6 times a week                               | 0.91      | 0.33 | 2.53  | 0.844  |
| Everyday                                       | 0.63      | 0.16 | 2.41  | 0.413  |
| Every day, several times a day                 | 1.67      | 0.10 | 26.94 | 0.702  |
| <b>Sugar (white or brown)</b>                  |           |      |       |        |
| Never                                          | Reference |      |       |        |
| Once a month or less                           | 0.90      | 0.51 | 1.59  | 0.701  |
| Once a week or every 15 days                   | 1.28      | 0.71 | 2.29  | 0.400  |
| 2-3 times a week                               | 0.92      | 0.50 | 1.69  | 0.740  |
| 4-6 times a week                               | 1.29      | 0.64 | 2.60  | 0.401  |
| Everyday                                       | 1.26      | 0.79 | 2.02  | 0.309  |
| Every day, several times a day                 | 2.07      | 1.21 | 3.53  | 0.008  |
| OR: Odds ratio, 95%CI: 95% Confidence interval |           |      |       |        |

Supplementary Figure S1. Difference between self-reported weight and BMI before and during lockdown.

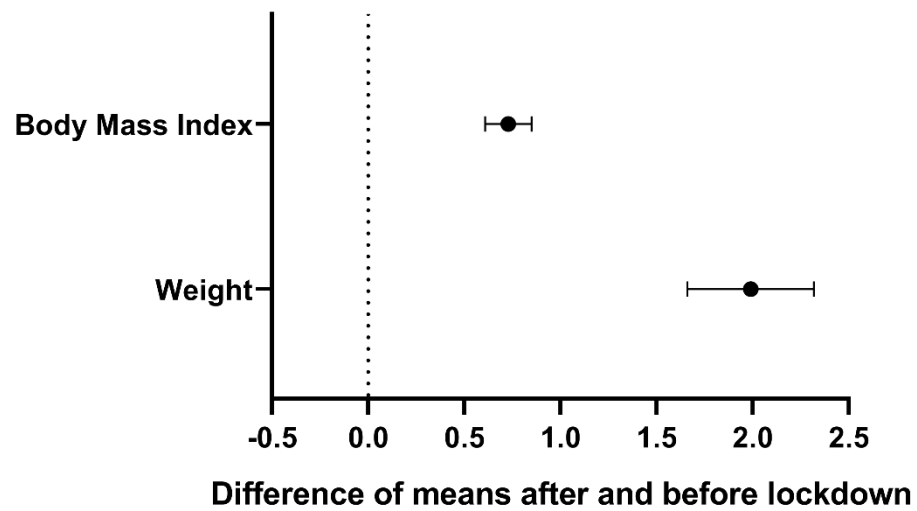

Mean of the difference and 95% CI of the difference are shown.



Supplementary Figure S2. Univariate logistic regression models to determine the odds of  $\geq 5\%$  self-reported weight gain during lockdown from demographic variables.

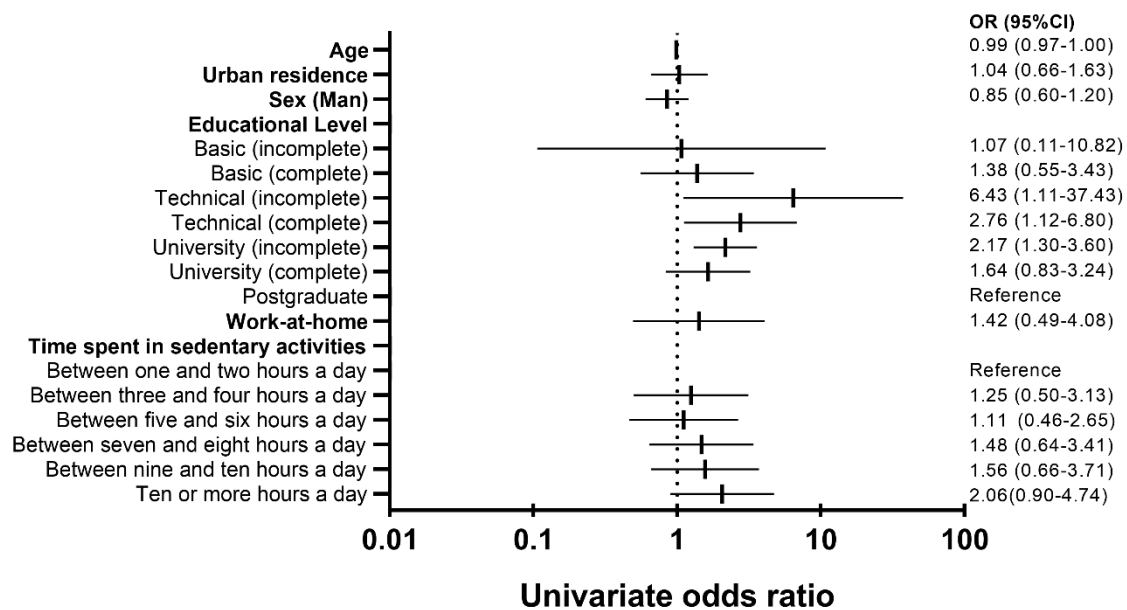

OR: Odds Ratio, 95% CI: 95% Confidence interval

Supplementary Figure S3. Univariate logistic regression models to determine the odds of  $\geq 5\%$  self-reported weight gain from eating habits during lockdown.

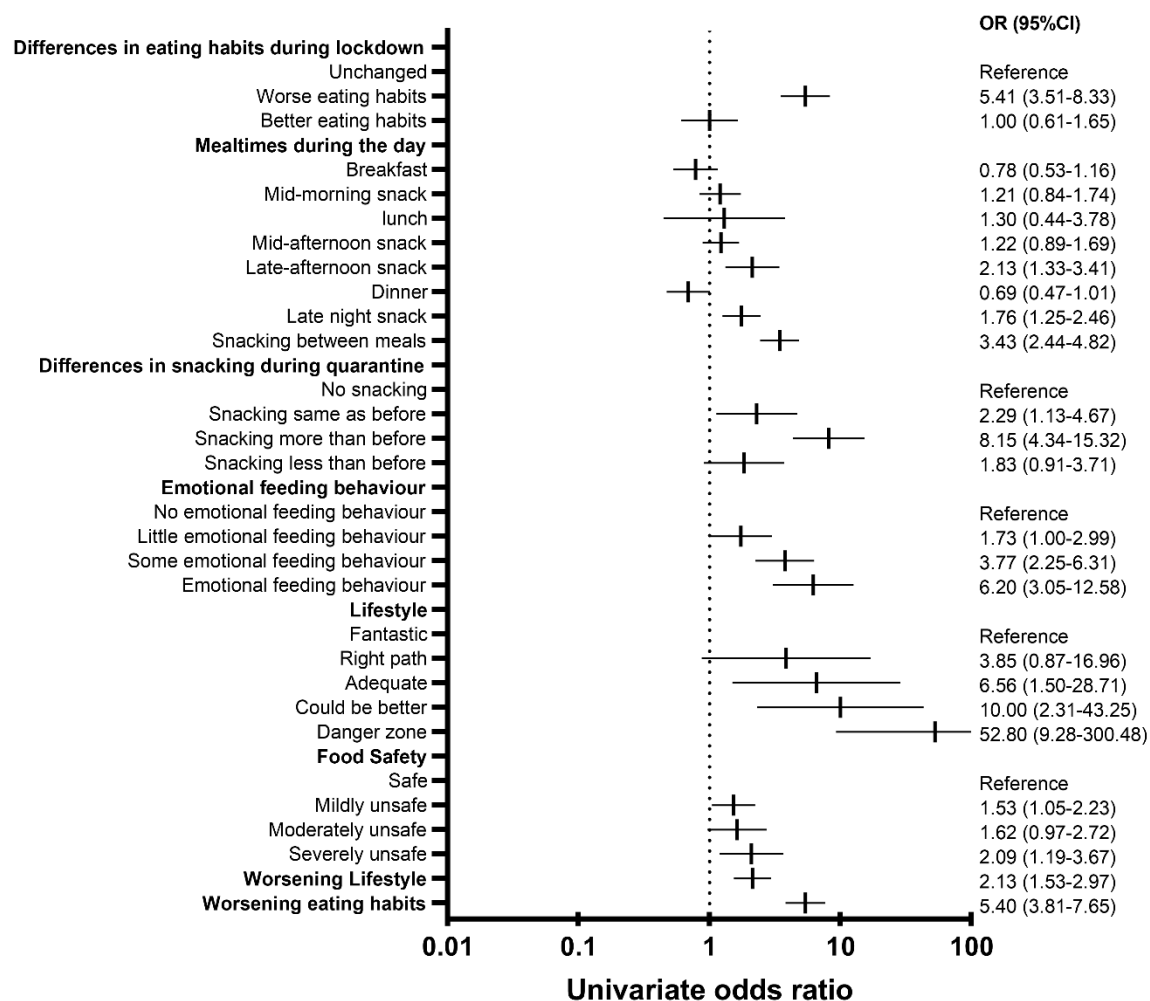

OR: Odds Ratio, 95% CI: 95% Confidence interval

Supplementary Figure S4. Univariate logistic regression models to determine the odds of  $\geq 5\%$  self-reported weight gain during lock-down from more dietary intake during lockdown.

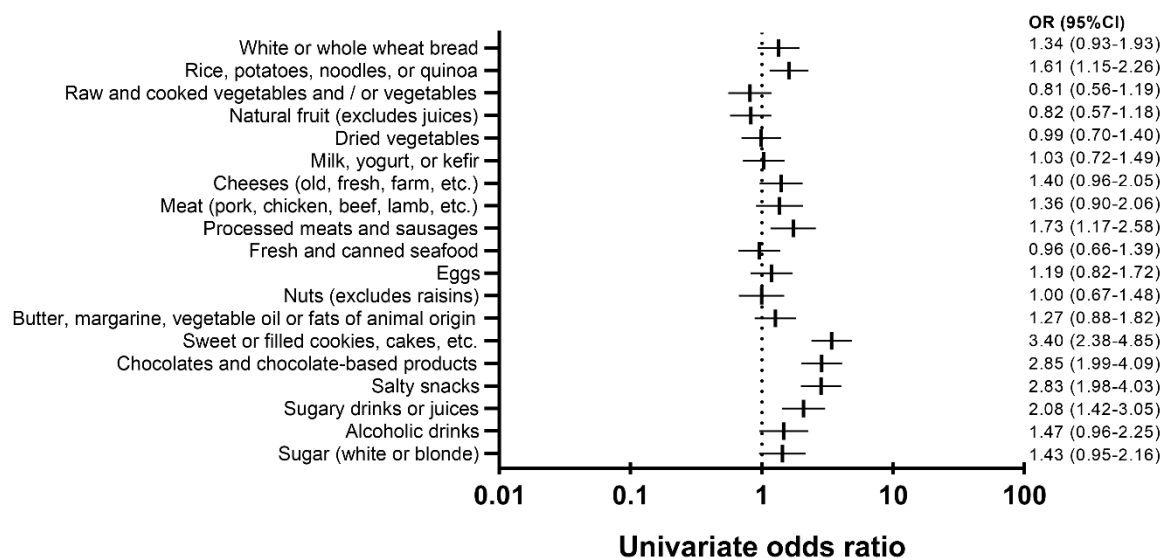

OR: Odds Ratio, 95% CI: 95% Confidence interval
